# Supplementary material for: Exploring power and parameter estimation of the BiSSE method for analyzing species diversification
Source: PubMed Central journal article supplement (PMC3583807; doi:10.1186/1471-2148-13-38), 2013-02-11

### A Speciation (Asymmetrical)

⊕ Low tip bias  $3_1:1_0$

○ High tip bias  $180_1:1_0$

500 Tips

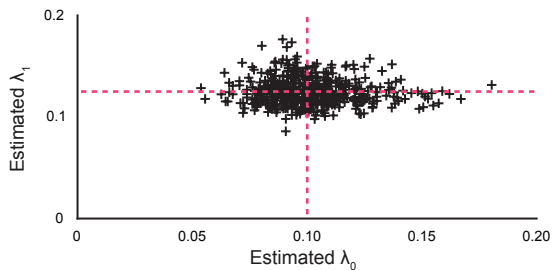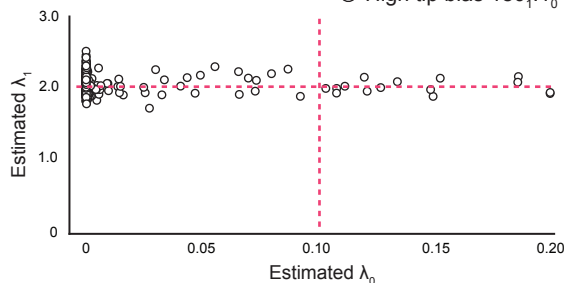

50 Tips

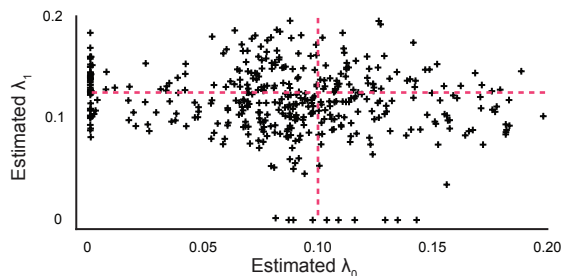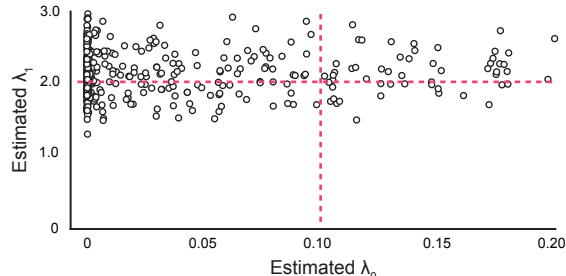

### B Character Change

500 Tips

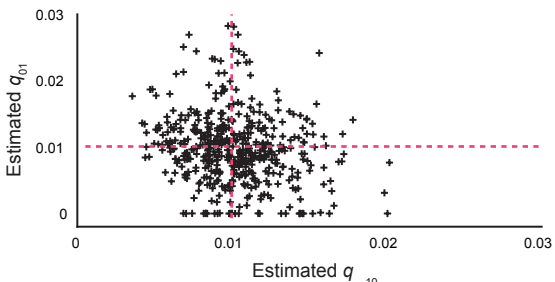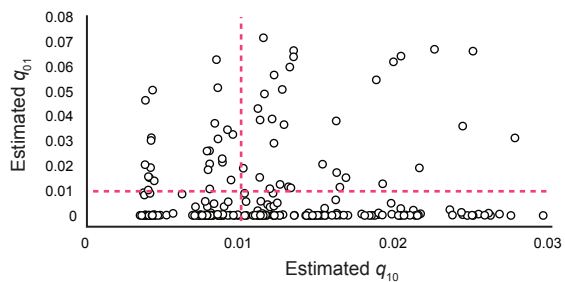

50 Tips

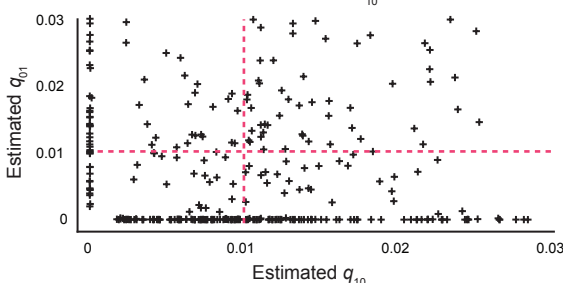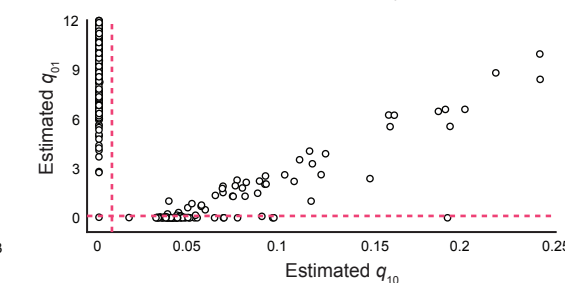

### C Extinction

500 Tips

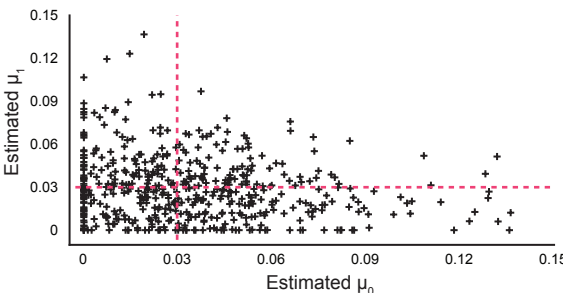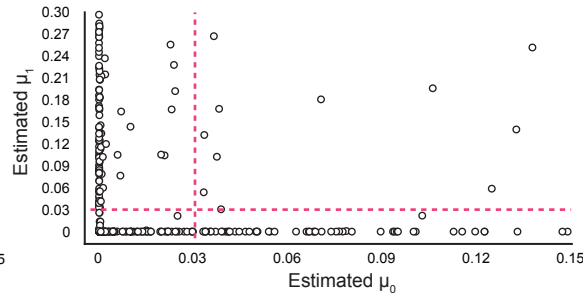

50 Tips

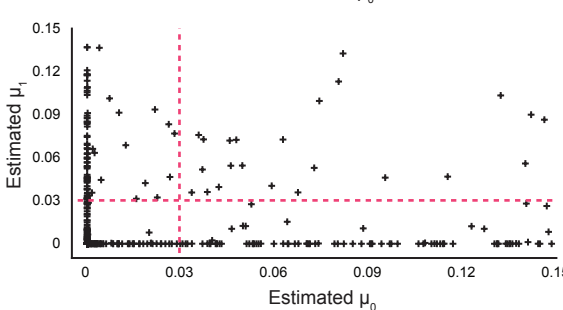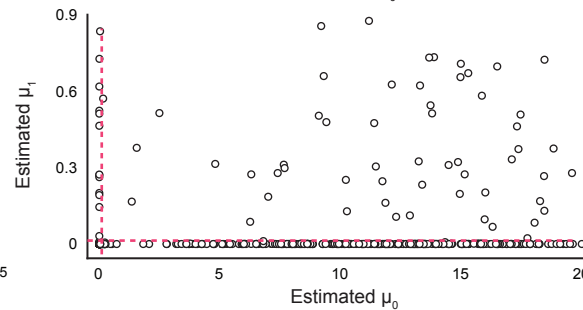

Supplement: 1471-2148-13-38-S2.pdf [file 1471-2148-13-38-S2.pdf]
